# Supplementary material
Source: PubMed Central journal article supplement (PMC4677889)
Supplement: supp_pp.15.00861_PP2015-00861R2_Supplemental_Figure_1.pdf [file supp_pp.15.00861_PP2015-00861R2_Supplemental_Figure_1.pdf]

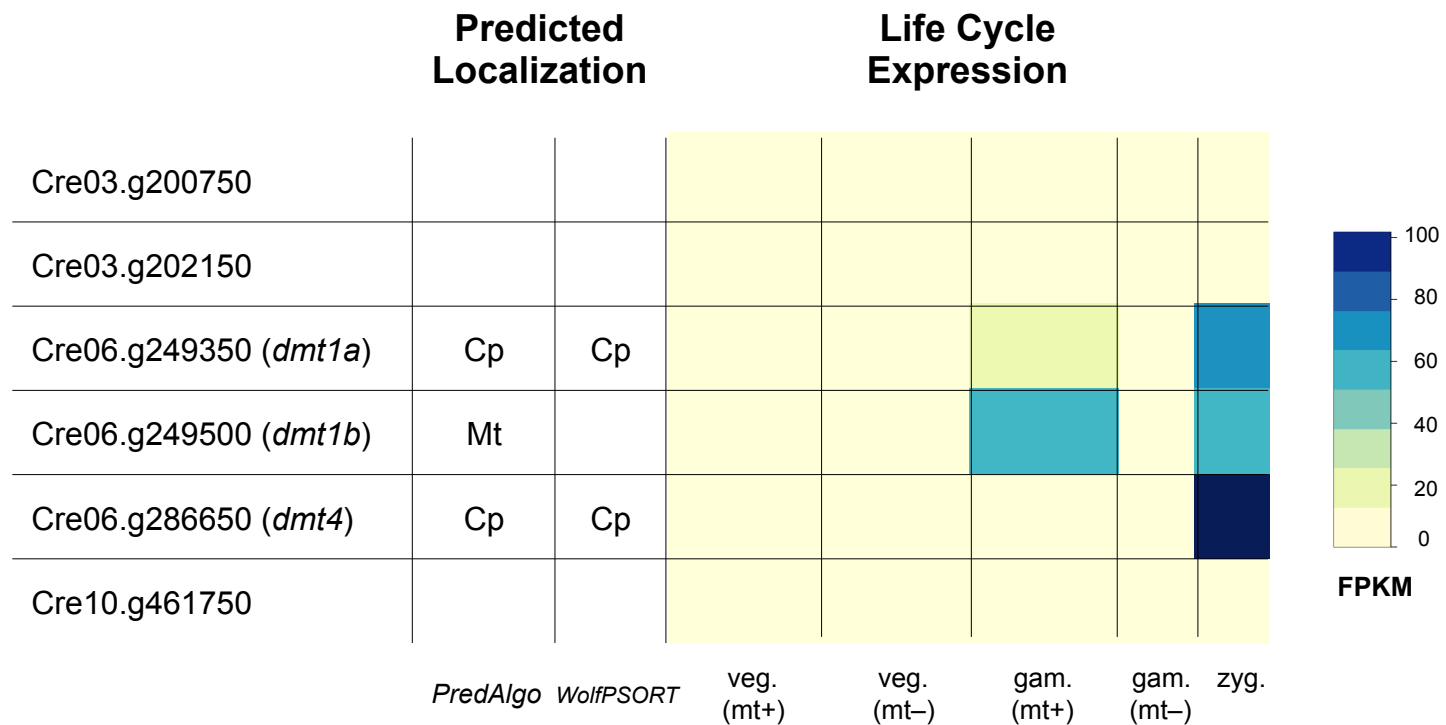

**Supplementary Figure 1. Candidate methyltransferases in *C. reinhardtii***

Candidate methyltransferases were identified by the presence of a DNA methyltransferase domain. Predicted localizations from *PredAlgo* and *WolfPSORT* are shown alongside the expression patterns of each candidate.
