# Supplementary material
Source: PubMed Central journal article supplement (PMC4677889)
Supplement: supp_pp.15.00861_PP2015-00861R2_Supplemental_Figure_2.pdf [file supp_pp.15.00861_PP2015-00861R2_Supplemental_Figure_2.pdf]

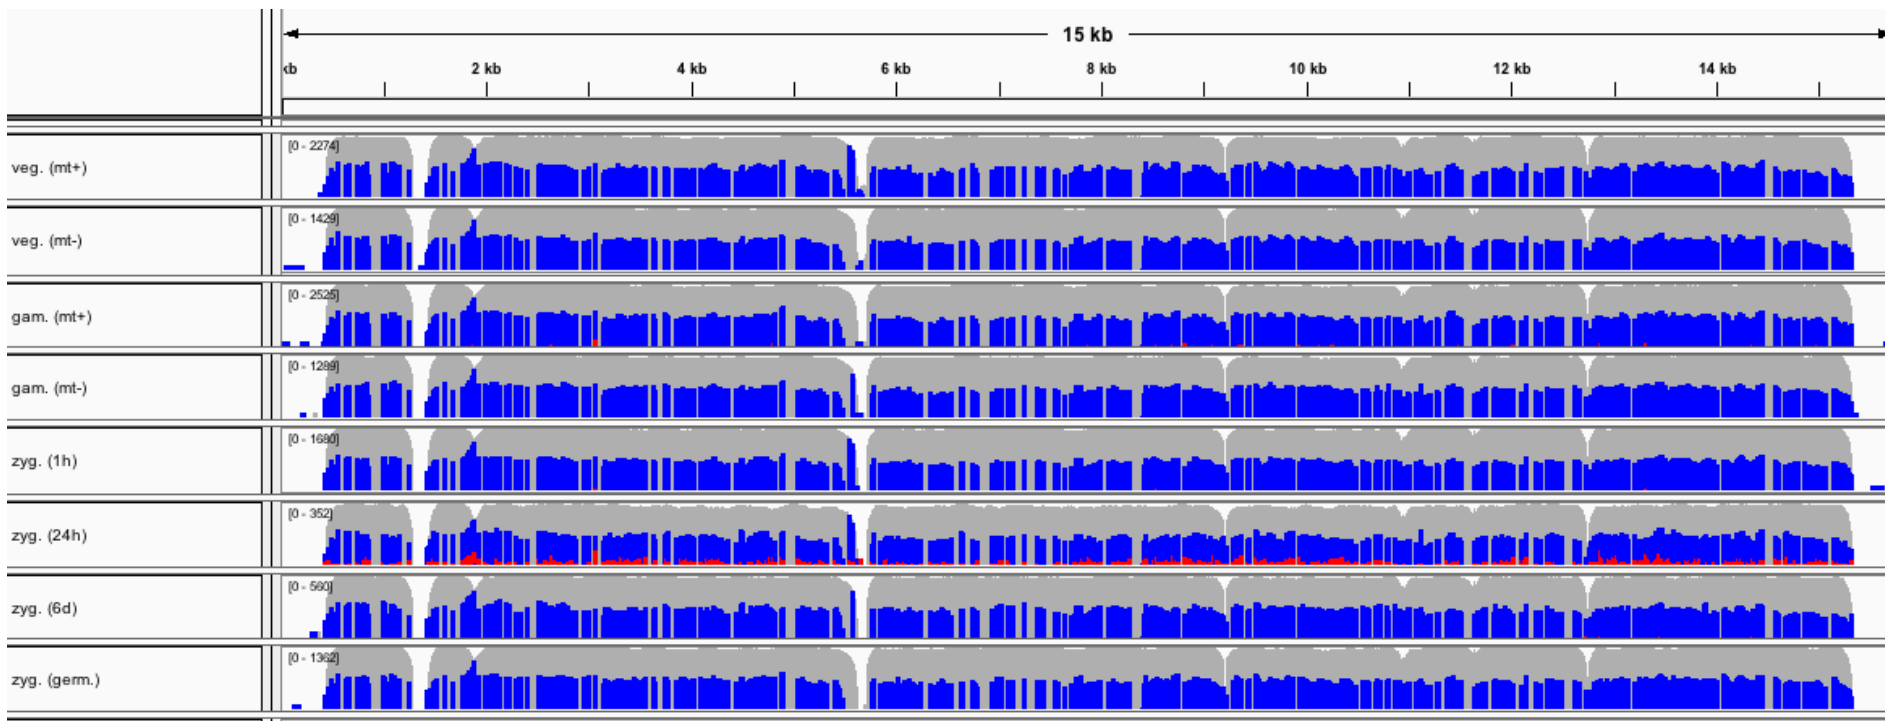

### Supplementary Figure 2. Methylation patterns for *Chlamydomonas* mtDNA

Cytosine methylation is absent (1-2% per-cytosine methylation) in all samples, with the exception of 24h zygotes (13% per-cytosine methylation). In the coverage plots, blue represents unmethylated cytosines (converted by bisulfite treatment), red represents methylated cytosines (unconverted), and gray represents the total coverage (including reads from the opposite strand which do not provide methylation information).
